# Supplementary material for: Confinement-induced alterations in the evaporation dynamics of sessile droplets
Source: Royal Society of Chemistry journal article supplement (doi:10.1039/c6sm02429g), 2017-01-01
Supplement: c6sm02429g3.pdf [file c6sm02429g3.pdf]

## Supporting Information

### Confinement-induced alterations in the evaporation dynamics of sessile droplets

**Movie 1.** Flow inside an unconfined droplet

**Movie 2.** Flow inside a confined droplet
